## ERRATUM

The Journal of Experimental Biology (1986) **121**, 451–455

The publishers regret that there is an error on page 452. Please replace with this corrected version.
